# Supplementary material for: Ginsenoside Rk1 induces apoptosis and downregulates the expression of PD-L1 by targeting the NF-κB pathway in lung adenocarcinoma
Source: Royal Society of Chemistry journal article supplement (doi:10.1039/c9fo02166c), 2019-11-29
Supplement: c9fo02166c1.pdf [file c9fo02166c1.pdf]

**Ginsenoside Rk1 induces apoptosis and down-regulates the expression of PD-L1  
by targeting NF- $\kappa$ B pathway in lung adenocarcinoma**

Manling Hu<sup>1,2,3,#</sup>, Jing Yang<sup>1,2,3,#</sup>, Linlin Qu<sup>1,2,3</sup>, Xuqian Deng<sup>1,2,3</sup>, Zhiguang Duan<sup>1,2,3</sup>, Rongzhan Fu<sup>1,2,3</sup>, Lihua Liang<sup>1,2,3</sup>, Daidi Fan<sup>1,2,3,\*</sup>

<sup>1</sup> Shaanxi Key Laboratory of Degradable Biomedical Materials, School of Chemical Engineering, Northwest University, Taibai North Road 229, Xi'an, Shaanxi, 710069, China

<sup>2</sup> Shaanxi R&D Center of Biomaterials and Fermentation Engineering, School of Chemical Engineering, Northwest University, Taibai North Road 229, Xi'an, Shaanxi, 710069, China

<sup>3</sup> Biotech & Biomed Research Institute, Northwest University, Taibai North Road 229, Xi'an, Shaanxi, 710069, China

#This authors contributed equally to this work.

\* Address correspondence to: Daidi Fan, E-mail: [fandaidi@nwu.edu.cn](mailto:fandaidi@nwu.edu.cn), Tel./fax: +86-29-88305118.

**Table S1 Information of antibodies for western blot.**

| <b>Antibody</b>               | <b>Working Dilution</b> | <b>Manufacturer</b> | <b>Molecular Weight (kDa)</b> | <b>Cat. Number</b> |
|-------------------------------|-------------------------|---------------------|-------------------------------|--------------------|
| Cleaved caspase-3             | 1:1000                  | Abcam               | 17                            | AB29034            |
| Cleaved caspase-8             | 1:1000                  | Abcam               | 47                            | AB40502            |
| Cleaved caspase-9             | 1:1000                  | Abcam               | 17                            | AB40503            |
| Cleaved PARP                  | 1:1000                  | Abcam               | 85                            | AB29033            |
| p21                           | 1:1000                  | CST                 | 21                            | #2947              |
| p53                           | 1:1000                  | CST                 | 53                            | #9282              |
| CDK4                          | 1:5000                  | CST                 | 30                            | #12790             |
| Cyclin D1                     | 1:10000                 | CST                 | 36                            | #55506             |
| Bax                           | 1:5000                  | Proteintech         | 21                            | 50599-2-Ig         |
| Bcl-2                         | 1:2000                  | Proteintech         | 26                            | 12789-1-AP         |
| IKK $\alpha$                  | 1:1000                  | CST                 | 85                            | #2682              |
| I $\kappa$ B Alpha            | 1:2000                  | Proteintech         | 36                            | 10268-1-AP         |
| NF- $\kappa$ B P65            | 1:4000                  | Proteintech         | 65                            | 10745-1-AP         |
| Phospho-IKK $\alpha$          | 1:1000                  | Abcam               | 85                            | ab38515            |
| Phospho-I $\kappa$ B $\alpha$ | 1:2000                  | Abcam               | 36                            | ab23783            |
| Phospho-P65                   | 1:1000                  | Abcam               | 60                            | ab106129           |
| PD-L1/CD274                   | 1:1000                  | Proteintech         | 45                            | 17952-1-AP         |
| $\beta$ -actin                | 1:50000                 | CST                 | 45                            | #4970              |
| GAPDH                         | 1:40000                 | CST                 | 37                            | #5174              |

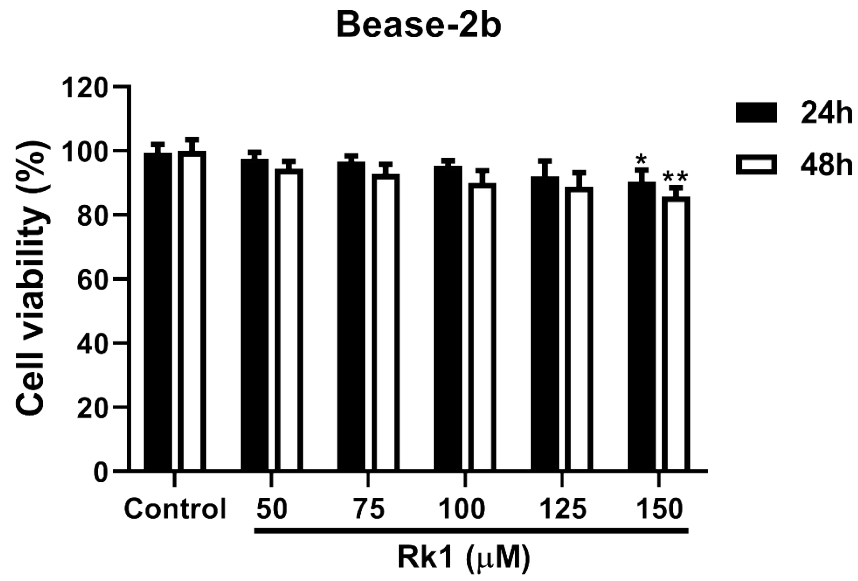

**Figure S1.** The cell viability of Bease-2b cell was measured *via* the MTT assay after Rk1 treatment. Data are presented as means  $\pm$  SD of three independent experiments,  $*p < 0.05$  and  $**p < 0.01$  compared with the control.
